# Supplementary material for: Validation and adjustment of the Patient Experience Questionnaire (PEQ) based on a Norwegian hospital study.
Source: Research Square preprint supplement (doi:10.21203/rs.3.rs-223253/v1), 2021-03-10
Supplement: Supplementary file 2 [file 431f6e68caa5d52d38888de6.docx]

**Validation and adjustment of the Patient Experience Questionnaire (PEQ) based on a Norwegian hospital study.**

**Seth Ayisi Addo Junior (Corresponding author)**

Research Fellow (PhD Candidate – Organisation and Leadership)

University of Stavanger Business School

University of Stavanger, 4036 Stavanger

Post- 8600 Forus, Norway.

**Espen Olsen (1st Co-author)**

Professor (Organisation and Leadership)

Head of Dept. (Dept. of Innovation, Leadership and Marketing)

University of Stavanger Business School

University of Stavanger, 4036 Stavanger

Post- 8600 Forus, Norway.

**Reidar Johan Mykletun (2nd Co-author)**

Professor Emeritus (Psychology)

University of Stavanger Business School

University of Stavanger, 4036 Stavanger

Post- 8600 Forus, Norway.

**Supplementary tables**

Metric invariance across department aggregates

| Item |  | Dim. | Kir | | Med | |  |
| --- | --- | --- | --- | --- | --- | --- | --- |
|  |  |  | estimate | P | estimate | P | z-stat |
| sp9 | <--- | N6 | 1.23 | 0.00 | 1.26 | 0.00 | 0.42 |
| sp8 | <--- | N5 | 1.13 | 0.00 | 1.15 | 0.00 | 0.43 |
| sp7 | <--- | N4 | 0.92 | 0.00 | 0.99 | 0.00 | 1.77* |
| sp6 | <--- | N3 | 0.87 | 0.00 | 0.90 | 0.00 | 0.86 |
| sp5 | <--- | N2 | 0.91 | 0.00 | 0.93 | 0.00 | 0.76 |
| sp4 | <--- | N1 | 0.65 | 0.00 | 0.75 | 0.00 | 3.43*** |
| sp16 | <--- | D6 | 1.27 | 0.00 | 1.16 | 0.00 | -2.56** |
| sp15 | <--- | D5 | 1.15 | 0.00 | 1.07 | 0.00 | -1.97** |
| sp14 | <--- | D4 | 1.25 | 0.00 | 1.12 | 0.00 | -3.06*** |
| sp13 | <--- | D3 | 0.82 | 0.00 | 0.88 | 0.00 | 1.81* |
| sp12 | <--- | D2 | 1.15 | 0.00 | 1.07 | 0.00 | -2.08** |
| sp11 | <--- | D1 | 0.90 | 0.00 | 0.85 | 0.00 | -1.57 |
| sp19 | <--- | IF3 | 0.98 | 0.00 | 0.99 | 0.00 | 0.34 |
| sp18 | <--- | IF1 | 0.84 | 0.00 | 0.85 | 0.00 | 0.19 |
| sp24 | <--- | OR3 | 0.93 | 0.00 | 0.95 | 0.00 | 0.50 |
| sp23 | <--- | OR2 | 0.97 | 0.00 | 0.90 | 0.00 | -1.34 |
| sp22 | <--- | OR1 | 0.87 | 0.00 | 0.89 | 0.00 | 0.58 |
| sp26 | <--- | NK1 | 0.95 | 0.00 | 0.84 | 0.00 | -2.56** |
| sp32 | <--- | ST5 | 0.85 | 0.00 | 0.83 | 0.00 | -0.31 |
| sp31 | <--- | ST4 | 1.06 | 0.00 | 1.07 | 0.00 | 0.01 |
| sp30 | <--- | ST3 | 0.97 | 0.00 | 1.03 | 0.00 | 0.91 |
| sp29 | <--- | ST2 | 0.91 | 0.00 | 1.00 | 0.00 | 1.73* |
| sp28 | <--- | ST1 | 0.89 | 0.00 | 0.98 | 0.00 | 1.67* |
| sp44 | <--- | DC1 | 1.00 | 0.00 | 0.97 | 0.00 | -0.69 |
| sp47 | <--- | IT1 | 1.11 | 0.00 | 1.18 | 0.00 | 0.55 |

Note:* (<.05),** (<.01), *** (<.001) - not metrically invariant; NS: nurse services; DS: doctor services; IFN: information; ORG: organisation; NK: next of kin; ST: standard; DCH: discharge; ITR: interaction.

Scalar invariance across department aggregates

| Model | DF | CMIN | P |
| --- | --- | --- | --- |
| Measurement weights | 23 | 61.20 | .00 |
| Measurement intercepts | 23 | 61.20 | .00 |
| Structural covariances | 73 | 254.70 | .00 |
| Measurement residuals | 119 | 391.29 | .00 |

Note: p<.05- no scalar invariance.
